# Supplementary material for: Relationships between nocturia and geriatric syndromes among community-dwelling older adults: the NOSE study
Source: Research Square preprint supplement (doi:10.21203/rs.3.rs-7884797/v1), 2025-11-25
Supplement: Supplementary file 1 [file 06127bbab04112515e158857.xlsx]

## Sheet: Main_Data_Tables 3
Table 2
Univariate models of binary logistic regression analysis of relationships between GSs and nocturia (>=2 voids/night)
		Overall participants		Males		Females
		cOR (c95% CI)	cp value	cOR (c95% CI)	cp value	cOR (c95% CI)	cp value
GSs (yes)	Loss of appetite	1.23(0.84-1.79)	0.288588	1.20(0.69-2.11)	0.518	1.21(0.72-2.05)	0.477
	Poor vision	0.87(0.63-1.19)	0.378481	0.84(0.53-1.33)	0.451	0.97(0.62-1.52)	0.892
	Poor hearing	1.34(0.99-1.80)	0.0560612	1.14(0.73-1.78)	0.562	1.50(0.99-2.26)	0.054
	Tinnitus	1.34(0.96-1.87)	0.0856035	1.30(0.81-2.08)	0.277	1.11(0.67-1.83)	0.68
	Dizziness and stagger	1.38(0.96-1.98)	0.0784746	1.86(1.07-3.26)	0.029	1.11(0.67-1.83)	0.68
	Numbness	1.59(1.15-2.21)	0.00549186	2.03(1.23-3.36)	0.006	1.31(0.83-2.06)	0.247
	Skin problems	1.12(0.83-1.51)	0.44177	1.02(0.65-1.60)	0.928	1.26(0.84-1.90)	0.263
	Poor sleep	1.90(1.39-2.59)	5.53251e-05	2.04(1.25-3.31)	0.004	1.97(1.29-3.00)	0.002
	General weakness	1.17(0.83-1.65)	0.363408	1.69(0.99-2.88)	0.053	0.85(0.54-1.34)	0.485
	Body instability	1.38(1.00-1.92)	0.0527683	1.71(1.05-2.80)	0.032	1.11(0.70-1.76)	0.653
	Fear of falling	1.26(0.93-1.70)	0.142747	1.57(0.95-2.59)	0.078	1.39(0.93-2.10)	0.113
	Leg edema	1.55(1.08-2.23)	0.0167738	1.96(1.02-3.76)	0.044	1.72(1.09-2.71)	0.02
	Shortness of breath	1.22(0.86-1.72)	0.256695	1.06(0.64-1.76)	0.829	1.31(0.81-2.12)	0.266
	Constipation	1.25(0.89-1.76)	0.200099	1.20(0.68-2.14)	0.529	1.52(0.98-2.37)	0.061
	Physical pain	1.03(0.76-1.38)	0.863	1.00(0.64-1.56)	0.996	1.16(0.77-1.74)	0.486
Abbreviations: GSs, geriatric syndromes; cOR, crude odds ratio; c95% CI, crude 95% confidence interval; cp value, crude p value. Reference group: absence of each GS (i.e., “no” = OR 1.00). The significance level = 0.05.
