# Supplementary material for: Relationships between nocturia and geriatric syndromes among community-dwelling older adults: the NOSE study
Source: Research Square preprint supplement (doi:10.21203/rs.3.rs-7884797/v1), 2025-11-25
Supplement: Supplementary file 2 [file 449781711a88c22ede1372fc.xlsx]

## Sheet: Table_SuppInfo
Table 1					Table 2
Characteristic of nocturia-related factors and GSs of the overall participants					Multivariable models of binary logistic regression analysis of relationships between nocturia and spinal disease(s)
			Overall participants			Overall sample		Males		Females
			N=744			aOR (a95% CI)	ap value	aOR (a95% CI)	ap value	aOR (a95% CI)	ap value
Age(years old,mean±SD;range)			73.06±5.51[65,92]		No spinal disease	1.00(ref.)	-	1.00(ref.)	-	1.00(ref.)	-
Sex,female(n,%)			432(58.1)		Spinal disease(s)†	1.26(0.83-1.91)	0.270181	1.84(1.00-3.40)	0.0501434	0.86(0.47-1.58)	0.634788
Educational year(s)(mean±SD;range)			12.49±2.15[6,20]		Spinal disease(s)*	1.27(0.84-1.94)	0.259447	1.91(1.02-3.56)	0.0428642	0.87(0.47-1.59)	0.64233
Economic status(n,%)					Abbreviations: aOR, adjusted odds ratio; a95% CI, adjusted 95% confidence interval; ap value, adjusted p value. †:Adjusted variables: age, (sex,) current smoking, drinking frequency, diabetes, overweight, OSBP, non-psychotropic medication(s). *: Adjusted variables: age, (sex,) current smoking, drinking frequency, diabetes, overweight, OSBP, antihypertensive medication(s),nocturia-related medicati…
	Good		19(2.6)
	Normal		551(74.1)
	Bad		94(12.6)
Current smoking(n,%)			75(10.1)
Drinking frequency(2-7days/week)(n,%)			253(34.0)
BMI(kg/m2,mean±SD;range)			23.36±3.26
Office BP(mmHg)a
	OSBP	Mean±SD	138.60±19.21
	ODBP	Mean±SD	82.20±10.78
Nocturia(>=1/night;n,%)			577(77.6)
Nocturia(>=2/night;n,%)			280(37.6)
GS(n,%)
	Loss of appetite		137(18.4)
	Poor vision		506(68.0)
	Poor hearing		365(49.1)
	Tinnitus		194(26.1)
	Dizziness and stagger		153(20.6)
	Numbness		201(27.0)
	Skin problems		332(44.6)
	Poor sleep		249(33.5)
	General weakness		552(74.2)
	Body instability		206(27.7)
	Fear of falling		278(37.4)
	Leg edema		152(20.4)
	Shortness of breath		177(23.8)
	Constipation		180(24.2)
	Physical pain		361(48.5)
CKD and/or CN(n,%)			7(0.9)
Hyperuricemia(n,%)			32(4.3)
Other urologic condition(s)(n,%)a			195(26.2)
Diabetes(n,%)			102(13.7)
Heart failure(n,%)			4(0.5)
Spinal disease(s)(n,%)b			127(17.1)
Neuropsychiatric condition(s)(n,%)c			22(3.0)
Antihypertensive medication(s)(n,%)			192(25.8)
Nocturia-related medication(s)(n,%)			64(8.6)
Psychotropic medication(s)(n,%)			80(10.8)
Abbreviations: SD, standard deviation; BMI, body mass index; OSBP, office systolic blood pressure; ODBP, office diastolic blood pressure; GS, geriatric syndrome; CKD, chronic kidney disease; CN, chronic nephritis. Values are presented in n-values (percentages) or mean±SD and range [minimum, maximum]. a: Prostate cancer, acute nephritis, urinary calculus, cystitis, pyelonephritis, prostatic hyperp…
