# Supplementary material for: Relationships between nocturia and geriatric syndromes among community-dwelling older adults: the NOSE study
Source: Research Square preprint supplement (doi:10.21203/rs.3.rs-7884797/v1), 2025-11-25
Supplement: Supplementary file 3 [file 9bde033bb3362abfc29dfdcf.xlsx]

## Sheet: Sheet1
Table 1
Comparisons of characteristics of nocturia-related factors between the groups without nocturia and with nocturia (>=2 voids/night)
			Overall participants			Males			Females
			No nocturia	Nocturia	p value	No nocturia	Nocturia	p value	No nocturia	Nocturia	p value
			n=464(62.4)	n=280(37.6)		n=165(52.9)	n=147(47.1)		n=299(69.2)	n=133(30.8)
Age(n,%)	Mean±SDb		71.97±4.98	74.86±5.87	<0.001	71.54±4.89	74.18±5.78	<0.001	72.21±5.02	75.62±5.89	<0.001
Sex(n,%)a
	Male		165(52.9)	147(47.1)	<0.001	-	-	-	-	-	-
	Female		299(69.2)	133(30.8)		-	-	-	-	-	-
Educational year(s)(n,%)
	>=13 years		151(32.5)	76(27.1)	0.02	59(35.8)	50(34.0)	0.665	92(30.8)	26(19.5)	0.004
	10-12 years		266(57.3)	157(56.1)		88(53.3)	76(51.7)		178(59.5)	81(60.9)
	<=9 year(s)		47(10.1)	47(16.8)		18(10.9)	21(14.3)		29(9.7)	26(19.5)
Economic status(n,%)
	Good		9(1.9)	10(3.6)	0.17	2(1.2)	5(3.4)	0.17	7(2.3)	5(3.8)	0.665
	Normal		353(76.1)	198(70.7)		127(77.0)	101(68.7)		226(75.6)	97(72.9)
	Bad		102(22.0)	72(25.7)		36(21.8)	41(27.9)		66(22.1)	31(23.3)
Current smoking(n,%)a			51(11.0)	24(8.6)	0.316	43(26.1)	20(13.6)	0.007	8(2.7)	4(3.0)	1
Drinking frequency(n,%)
	None		257(55.4)	128(45.7)	0.002	59(35.8)	42(28.6)	0.393	198(66.2)	86(64.7)	0.518
	0-5day(s)/month		71(15.3)	35(12.5)		14(8.5)	13(8.8)		57(19.1)	22(16.5)
	2-7days/week		136(29.3)	117(41.8)		92(55.8)	92(62.6)		44(14.7)	25(18.8)
BMI(kg/m2,n,%)
	Underweight<21.5		139(30.0)	71(25.4)	0.322	30(18.2)	29(19.7)	0.926	109(36.5)	42(31.6)	0.452
	Normal weight21.5-24.9		196(42.2)	132(47.1)		82(49.7)	73(49.7)		114(38.1)	59(44.4)
	Overweight>=25		129(27.8)	77(27.5)		53(32.1)	45(30.6)		76(25.4)	32(24.1)
Office BP(mmHg)b
	OSBP	Mean±SD	138.44±19.05	138.88±19.50	0.87	141.88±17.89	138.75±16.96	0.077	136.54±19.42	139.01±22.03	0.255
	ODBP	Mean±SD	82.33±11.03	81.99±10.35	0.916	84.03±11.79	81.62±9.50	0.083	81.39±10.50	82.40±11.24	0.345
CKD and/or CN(n,%)a			4(0.9)	3(1.1)	1	3(1.8)	3(2.0)	1	1(0.3)	0(0)	1
Hyperuricemia(n,%)a			14(3.0)	18(6.4)	0.039	14(8.5)	17(11.6)	0.449	0(0)	1(0.8)	0.308
Other urologic condition(s)(n,%)a,c			103(22.2)	92(32.9)	0.002	55(33.3)	69(46.9)	0.015	48(16.1)	23(17.3)	0.779
Diabetes(n,%)a			53(11.4)	49(17.5)	0.021	26(15.8)	35(23.8)	0.086	27(9.0)	14(10.5)	0.599
Heart failure(n,%)a			2(0.4)	2(0.7)	0.634	1(0.6)	1(0.7)	1	1(0.3)	1(0.8)	0.521
Spinal disease(s)(n,%)a,d			71(15.3)	56(20.0)	0.108	23(13.9)	37(25.2)	0.014	48(16.1)	19(14.3)	0.669
Neuropsychiatric condition(s)(n,%)a,e			14(3.0)	8(2.9)	1	5(3.0)	2(1.4)	0.453	9(3.0)	6(4.5)	0.409
Antihypertensive medication(s)(n,%)a			113(24.4)	79(28.2)	0.261	50(30.3)	54(36.7)	0.232	63(21.1)	25(18.8)	0.698
Nocturia-related medication(s)(n,%)a			18(3.9)	46(16.4)	<0.001	13(7.9)	37(25.2)	<0.001	5(1.7)	9(6.8)	0.014
Psychotropic medication(s)(n,%)a			52(11.2)	28(10.0)	0.628	15(9.1)	10(6.8)	0.534	37(12.4)	18(13.5)	0.756
Abbreviations: SD, standard deviation; BMI, body mass index; BP, blood pressure; OSBP, office systolic blood pressure; ODBP, office diastolic blood pressure; CKD, chronic kidney disease; CN, chronic nephritis. a: Fisher's exact test; b: Mann-Whitney U test. c: Prostate cancer, acute nephritis, urinary calculus, cystitis, pyelonephritis, prostatic hyperplasia, other kidney/uric acid/urinary tract/…
