# Supplementary material for: Relationships between nocturia and geriatric syndromes among community-dwelling older adults: the NOSE study
Source: Research Square preprint supplement (doi:10.21203/rs.3.rs-7884797/v1), 2025-11-25
Supplement: Supplementary file 4 [file c367c6b9110464a53ebf4317.xlsx]

## Sheet: Main_Data_Tables 4
Table 3
Multivariable models of binary logistic regression analysis of relationships between GSs and nocturia (>=2 voids/night)
		Overall participants		Males		Females
		aOR (a95% CI)	ap value	aOR (a95% CI)	ap value	aOR (a95% CI)	ap value
GSs (yes)	Loss of appetite	1.08(0.71-1.64)	0.730601	1.30(0.69-2.46)	0.410089	0.95(0.52-1.72)	0.868488
	Poor vision	1.09(0.77-1.55)	0.631149	0.93(0.56-1.55)	0.78949	1.27(0.78-2.08)	0.338694
	Poor hearing	1.13(0.82-1.56)	0.449716	0.99(0.61-1.60)	0.959386	1.26(0.81-1.96)	0.30016
	Tinnitus	1.19(0.83-1.72)	0.345022	1.32(0.79-2.21)	0.29238	1.05(0.61-1.80)	0.854829
	Dizziness and stagger	1.28(0.86-1.90)	0.232847	1.78(0.96-3.31)	0.0686031	1.03(0.60-1.77)	0.917095
	Numbness	1.45(1.01-2.08)	0.0419374	2.08(1.19-3.64)	0.0100044	1.05(0.64-1.73)	0.852451
	Skin problems	1.12(0.81-1.55)	0.500968	0.98(0.60-1.62)	0.951272	1.32(0.85-2.05)	0.224256
	Poor sleep	1.90(1.33-2.70)	0.000373248	2.04(1.18-3.54)	0.0111304	1.93(1.20-3.10)	0.00677537
	General weakness	1.08(0.74-1.56)	0.701257	1.69(0.94-3.03)	0.0769938	0.77(0.47-1.25)	0.287106
	Body instability	1.16(0.81-1.68)	0.419598	1.26(0.72-2.20)	0.416529	1.14(0.69-1.89)	0.609976
	Fear of falling	1.16(0.82-1.64)	0.411658	1.27(0.72-2.22)	0.410426	1.09(0.69-1.71)	0.714601
	Leg edema	1.78(1.18-2.67)	0.00556794	1.90(0.92-3.91)	0.0806274	1.84(1.11-3.07)	0.018999
	Shortness of breath	1.10(0.75-1.61)	0.636505	0.86(0.48-1.52)	0.594414	1.33(0.78-2.26)	0.302329
	Constipation	1.21(0.82-1.77)	0.338138	1.02(0.53-1.97)	0.94174	1.34(0.83-2.18)	0.231393
	Physical pain	1.00(0.72-1.38)	0.987054	0.90(0.55-1.47)	0.672094	1.08(0.69-1.68)	0.736079
Abbreviations: GSs, geriatric syndromes; aOR, adjusted odds ratio; a95% CI, adjusted 95% confidence interval; ap value, adjusted p value. Adjusted variables: age, (sex), educational year(s), economic status, current smoking, drinking frequency, overweight, OSBP, urologic condition(s), diabetes, antihypertensive medication(s), nocturia-related medication(s), psychotropic medication(s). Reference g…
